# Supplementary material for: Structures Controlled by Entropy: The Flexibility of Strychnine as Example
Source: MDPI journal article supplement (doi:10.3390/molecules27227987), 2022-11-17
Supplement: s1 [file s1]

## Supplementary Information

### Structures Controlled by Entropy: the Flexibility of Strychnine as Example

Ulrich Sternberg and Raiker Witter

Table S1: Simulation parameters for Molecular Dynamics Simulations with Orientational NMR Constraints

| General parameters for the MDOC simulations                                 |         |
|-----------------------------------------------------------------------------|---------|
| Parameter                                                                   | Value   |
| Target temperature                                                          | 280 K   |
| MD time step                                                                | 0.5 fs  |
| BPT atomic charge calculation                                               | 0.5 fs  |
| Coupling time $\eta$ to the heat bath                                       | 0.02 ps |
| Memory decay time $\tau$ for the property average                           | 200 ps  |
| Time constant $\rho$ for the exponential rise of pseudo-forces              | 200 ps  |
| Order parameter of the alignment medium $S_{\text{am}}$ (dipolar couplings) | 0.01    |
| Total MD duration                                                           | 80 ns   |

| Width and weight parameters for the pseudo forces in MDOC simulations                           |        |
|-------------------------------------------------------------------------------------------------|--------|
| Parameter                                                                                       | Value  |
| Pseudo-force width $\Delta D$ for the one bond CH couplings                                     | 0.5 Hz |
| Weight parameter $k_D$ (one bond couplings - in $\text{kJ mol}^{-1} \text{Hz}^{-1}$ )           | 0.0008 |
| Pseudo-force width $\Delta R$ for the NOE distance constraints                                  | 0.2 Å  |
| Weight parameter $k_R$ (NOE distances - in $\text{kJ mol}^{-1} \text{Å}^{-1}$ )                 | 3      |
| Pseudo-force width $\Delta J$ for the $^3J_{\text{HH}}$ coupling constraints                    | 1.0 Hz |
| Weight parameter $k_J$ ( $^3J_{\text{HH}}$ couplings - in $\text{kJ mol}^{-1} \text{Hz}^{-1}$ ) | 10.0   |

Table S2: Comparison of experimental and MDOC simulated RDC values for Strychnine

| Atom A | Atom B | Experiment <sup>1</sup><br>RDC / Hz | MDOC<br>Simulation<br>RDC / Hz | Difference<br>Exp.-Sim.<br>Hz |
|--------|--------|-------------------------------------|--------------------------------|-------------------------------|
| H4     | C4     | -43,5                               | -43,183                        | -0,317                        |
| H3     | C3     | -12,8                               | -12,645                        | -0,155                        |
| H2     | C2     | -15,3                               | -15,177                        | -0,123                        |
| H1     | C1     | -43,5                               | -43,16                         | -0,34                         |
| H8     | C8     | 24,6                                | 24,057                         | 0,543 <sup>2)</sup>           |
| H16    | C16    | -14,8                               | -14,697                        | -0,103                        |
| H18b   | C18    | -20,6                               | -20,291                        | -0,309                        |
| H18a   | C18    | -9,1                                | -8,779                         | -0,321                        |
| H17a   | C17    | -25,5                               | -25,215                        | -0,285                        |
| H17b   | C17    | 13,5                                | 13,333                         | 0,167                         |
| H15a   | C15    | -8,1                                | -7,713                         | -0,387                        |
| H15b   | C15    | -2,2                                | -2,131                         | -0,069                        |
| H14    | C14    | 31,5                                | 30,718                         | 0,782 <sup>2)</sup>           |
| H13    | C13    | 12,2                                | 12,068                         | 0,132                         |
| H20a   | C20    | 18,9                                | 18,639                         | 0,261                         |
| H20b   | C20    | 10,2                                | 10,008                         | 0,192                         |
| H22    | C22    | 3                                   | 2,964                          | 0,036                         |
| H23b   | C23    | 6,3                                 | 6,149                          | 0,151                         |
| H23a   | C23    | 37,4                                | 36,983                         | 0,417                         |
| H12    | C12    | 32,4                                | 32,047                         | 0,353                         |
| H11b   | C11    | 33,9                                | 33,683                         | 0,217                         |
| H11a   | C11    | -25,8                               | -25,748                        | -0,052                        |

<sup>1</sup> Experiments of Thiele [36] with errors estimated to 0.5 Hz

<sup>2</sup> Outlier

Quality  $n/\chi^2$  = 2.58

Minimum  $(1/\chi^2)_i$  = 0.41

Table S3: Comparison of experimental and MDOC simulated NOE distances for Strychnine

| Atom A | Atom B | Experiment <sup>1</sup><br>/ Å | MDOC<br>Simulation<br>/ Å | Error <sup>2</sup> / Å | Difference<br>Exp.-Sim.<br>/ Å |
|--------|--------|--------------------------------|---------------------------|------------------------|--------------------------------|
| H1     | H15a   | 3.734                          | 3.735                     | 0.11                   | -0.001                         |
| H8     | H18b   | 2.147                          | 2.168                     | 0.05                   | -0.021                         |
| H8     | H15a   | 4.22                           | 4.174                     | 0.11                   | 0.046                          |
| H8     | H13    | 2.914                          | 2.96                      | 0.11                   | -0.046                         |
| H8     | H12    | 3.48                           | 3.51                      | 0.11                   | -0.03                          |
| H8     | H11b   | 2.536                          | 2.554                     | 0.05                   | -0.018                         |
| H16    | H18b   | 3.78                           | 3.784                     | 0.11                   | -0.004                         |
| H16    | H18a   | 3.611                          | 3.567                     | 0.11                   | 0.044                          |
| H16    | H15a   | 2.464                          | 2.472                     | 0.05                   | -0.008                         |
| H16    | H15b   | 2.475                          | 2.458                     | 0.05                   | 0.017                          |
| H16    | H13    | 3.872                          | 3.917                     | 0.11                   | -0.045                         |
| H16    | H20a   | 3.32                           | 3.301                     | 0.11                   | 0.019                          |
| H16    | H20b   | 3.959                          | 4.001                     | 0.11                   | -0.042                         |
| H18b   | H18a   | 1.691                          | 1.699                     | 0.05                   | -0.008                         |
| H18b   | H20b   | 2.343                          | 2.392                     | 0.05                   | -0.049                         |
| H18a   | H20b   | 2.748                          | 2.734                     | 0.05                   | 0.014                          |
| H15a   | H14    | 2.493                          | 2.487                     | 0.05                   | 0.006                          |
| H15a   | H13    | 2.188                          | 2.213                     | 0.05                   | -0.025                         |
| H15b   | H14    | 2.423                          | 2.43                      | 0.05                   | -0.007                         |
| H15b   | H20a   | 2.186                          | 2.217                     | 0.05                   | -0.031                         |
| H14    | H13    | 2.251                          | 2.298                     | 0.05                   | -0.047                         |
| H13    | H12    | 2.244                          | 2.301                     | 0.05                   | -0.057 <sup>3)</sup>           |
| H13    | H11b   | 3.788                          | 3.797                     | 0.11                   | -0.009                         |
| H20a   | H20b   | 1.781                          | 1.791                     | 0.05                   | -0.01                          |
| H20b   | H22    | 2.306                          | 2.379                     | 0.05                   | -0.073 <sup>3)</sup>           |
| H20b   | H23b   | 4.774                          | 4.699                     | 0.11                   | 0.075                          |
| H22    | H23b   | 2.37                           | 2.424                     | 0.05                   | -0.054 <sup>3)</sup>           |
| H22    | H23a   | 2.858                          | 2.893                     | 0.11                   | -0.035                         |
| H23b   | H11b   | 3.596                          | 3.685                     | 0.11                   | -0.089                         |
| H23a   | H12    | 2.232                          | 2.308                     | 0.05                   | -0.076 <sup>3)</sup>           |
| H23a   | H11b   | 4.254                          | 4.179                     | 0.11                   | 0.075                          |
| H12    | H11b   | 2.959                          | 2.942                     | 0.11                   | 0.017                          |
| H11b   | H11a   | 1.795                          | 1.788                     | 0.05                   | 0.007                          |

<sup>1</sup> Experiments of Kolmer et al. [13]

<sup>2</sup> Error estimated according the rules as given by Butts et al. [14]

<sup>3</sup> Outlier

Quality  $n/\chi^2$  = 2.61

Minimum  $(1/\chi^2)_i$  = 0.43

Table S4: Comparison of experimental and MDOC simulated  $^3J_{HH}$  couplings for Strychnine

| Atom A | Atom B | Experiment <sup>1</sup><br>/ Hz | MDOC<br>Simulation<br>/ Hz | Error / Hz <sup>2</sup> | Difference<br>Exp.-Sim.<br>/ Hz |
|--------|--------|---------------------------------|----------------------------|-------------------------|---------------------------------|
| H8     | H13    | 10.41                           | 10.169                     | 1.25                    | -0.241                          |
| H16    | H15b   | 4.33                            | 3.659                      | 1.25                    | -0.671                          |
| H16    | H15a   | 2.42                            | 2.856                      | 1.25                    | 0.436                           |
| H18b   | H17b   | 7.2                             | 6.308                      | 1.25                    | -0.892                          |
| H18b   | H17a   | 10.7                            | 11.122                     | 1.25                    | 0.422                           |
| H18a   | H17b   | 3.2                             | 2.451                      | 1.25                    | -0.749                          |
| H18a   | H17a   | 5.5                             | 5.332                      | 1.25                    | -0.168                          |
| H15a   | H14    | 1.96                            | 2.313                      | 1.25                    | 0.353                           |
| H15b   | H14    | 4.11                            | 3.86                       | 1.25                    | -0.25                           |
| H14    | H13    | 3.29                            | 2.958                      | 1.25                    | -0.332                          |
| H13    | H12    | 3.3                             | 3.127                      | 1.25                    | -0.173                          |
| H12    | H11a   | 8.47                            | 8.74                       | 1.25                    | 0.27                            |
| H12    | H11b   | 3.34                            | 4.332                      | 1.25                    | 0.992                           |

<sup>1</sup> Experiments of Kolmer et al. [13] (Supplementary Information); the assignment of the couplings of H18b(proR) to H17a/b(proR/S) and the assignment of H12 to H11a/b(proS/R) was interchanged.

<sup>2</sup> The error is the sum of the experimental error (0.65 Hz) and the error of the calculation using the Altona equation (0.6 Hz).

Quality  $n/\chi^2$  = 5.57

Minimum  $(1/\chi^2)_i$  = 1.59
